# Supplementary material for: Design of Full-Temperature-Range RWGS Catalysts: Impact of Alkali Promoters on Ni/CeO2
Source: PubMed Central journal article supplement (PMC9945166; doi:10.1021/acs.energyfuels.2c00784), 2022-05-25
Supplement: ef2c00784_si_001.pdf [file ef2c00784_si_001.pdf]

# SUPPORTING INFORMATION

## Design of Full-Temperature-Range RWGS Catalysts: Impact of Alkali Promoters on Ni/CeO<sub>2</sub>

Jesus Gandara-Loe <sup>a\*</sup>, Qi Zhang <sup>b</sup>, Juan José Villora-Picó <sup>c</sup>, Antonio Sepúlveda-Escribano <sup>c</sup>,  
Laura Pastor-Pérez <sup>a,b</sup>, Tomas Ramirez Reina <sup>a,b</sup>

<sup>a</sup> *Department of Inorganic Chemistry and Materials Sciences Institute, University of Seville-CSIC, 41092, Seville, Spain*

<sup>b</sup> *Department of Chemical and Process Engineering, University of Surrey, Guildford, GU2 7XH, United Kingdom*

<sup>c</sup> *Laboratorio de Materiales Avanzados, Departamento de Química Inorgánica -Instituto Universitario de Materiales de Alicante, Universidad de Alicante, Alicante, E-03080, Spain*

\* Corresponding author:

[jgloe@us.es](mailto:jgloe@us.es) (*Jesus Gandara-Loe*)

***TABLE OF CONTENT***

Figure S1.....S-3

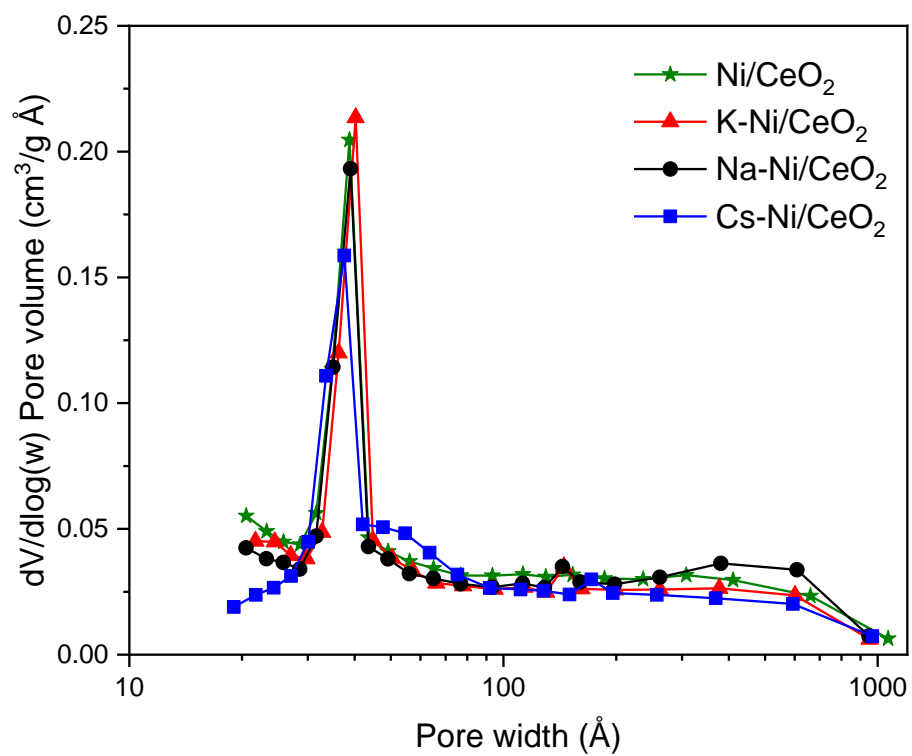

**Figure S1.** Pore size distribution of the catalyst calculated on the desorption branch using the BJH model.
